# Supplementary material
Source: Research Square preprint supplement (doi:10.21203/rs.3.rs-8706895/v1)
Supplement: Supplementary file 1 [file 2aecd01141200dd70f6d3b66.docx]

**Questionnaire on Lifestyle, New Tea Drink Consumption Patterns and Health Status among Chinese College Students**

Dear Respondent,

Greetings! We are a research team from Chongqing Medical University, currently conducting an important study on *Lifestyle, New Tea Drink Consumption Patterns, and Health Status among Chinese College Students*.

We assure you that this survey strictly complies with all applicable laws and regulations. Your personal information and responses will be kept strictly confidential. All collected data will be used solely for statistical analysis and will never be utilized for any commercial or illegal purposes. Please kindly spare **5–8 minutes** to complete the following questionnaire carefully. Your participation will make a significant contribution to our research.

Research Team

School of Public Health, Chongqing Medical University

**PART 1**

**Instruction:** The following questions aim to investigate your new tea drink consumption, daily lifestyle behaviors, and health status. Please read each item carefully and select the option that best matches your actual situation.

**1. Have you purchased any new tea drinks in the past two weeks?**

(By “new tea drinks,” we refer to beverages typically prepared fresh by combining tea with milk, fruit, coffee, or flavored syrups)

○ No (*Skip to Question 6*)

○ Yes

**2. How frequently did you purchase new tea drinks in the past two weeks?**

○ Less than once per month

○ 1-2 times per month

○ 1-2 times per week

○ 3-4 times per week

○ 5 or more times per week

**3. What is the typical size of new tea drinks you purchase?**

○ Small

○ Medium

○ Large

○ Extra-large

**4. What is your usual sugar preference when purchasing new tea drinks?**

○ No additional sugar

○ 30% sugar

○ 50% sugar

○ 70% sugar

○ Full sugar (100%)

**5. What is your average weekly cost on new tea drinks?**

○ Less than ¥10

○ ¥10-¥19

○ ¥20-¥49

○ ¥50-¥99

○ ¥100 or more

**6. In the past two weeks, did you eat at least four different types of fresh fruits and vegetables on average per day?**

○ No

○ Yes

**7. What is your current alcohol consumption frequency?**

○ Never had it

○ ≤1 time per month

○ 2-4 times per month

○ 2-3 times per week

○ ≥4 times per week

**8. In the past two weeks, did you smoke more than one cigarette per day on average?**

○ No

○ Yes

**9. In the past month, have you engaged in any physical activity?**

(By “new tea drinks,” we refer to beverages typically prepared fresh by combining tea with milk, fruit, coffee, or flavored syrups)

○ No (*Skip to Question 13*)

○ Yes

**10. How would you describe the intensity of your typical physical activity?**

○ Light intensity (*e.g., walking*)

○ Low intensity, non-strenuous activity (*e.g., tai chi*)

○ Moderate intensity, somewhat vigorous and sustained activity (*e.g., cycling, jogging*)

○ Vigorous intensity, causing rapid breathing and heavy sweating, but not sustained (*e.g., badminton*)

○ Vigorous intensity, causing rapid breathing and heavy sweating, and sustained over time (*e.g., soccer, swimming*)

**11. When engaging in physical activity of the intensity described above, how long does a typical session last?**

○ Less than 10 minutes

○ 11-20 minutes

○ 21-30 minutes

○ 31-59 minutes

○ 60 minutes or more

**12. In the past month, how frequently did you engage in physical activity of the type and intensity described above?**

○ Less than once per month

○ 2-3 times per month

○ 1-2 times per week

○ 3-5 times per week

○ Approximately once per day

**13. Have you ever been diagnosed with any of the following conditions by a healthcare professional? (Select all that apply)**

□ Fatty liver

□ Diabetes mellitus

□ Hypertension

□ Cardiovascular disease

□ Depression

□ Anxiety

□ None of the above

**PART 2**

**Instruction:** Please read each item carefully and select the response that best matches your current situation.

**1. Please evaluate your recent sleep problems (Matrix Single Choice)**

|  | None | Mild | Moderate | Severe | Very Severe |
| --- | --- | --- | --- | --- | --- |
| Difficulty falling asleep |  |  |  |  |  |
| Difficulty staying asleep |  |  |  |  |  |
| Early awakening |  |  |  |  |  |

**2. How satisfied are you with your current sleep?**

○ Very dissatisfied

○ Dissatisfied

○ Slightly dissatisfied

○ Satisfied

○ Very satisfied

**3. To what extent has your insomnia interfered with your daily functioning?** (*e.g., daytime fatigue, ability to work or handle daily tasks, attention, memory, mood, etc.*)

○ None

○ A little

○ Some

○ Quite a bit

○ Very much

**4. To what extent has your insomnia affected or impaired your quality of life?**

○ None

○ A little

○ Some

○ Quite a bit

○ Very much

**5. How much do you worry about your current sleep problem?**

○ None

○ A little

○ Some

○ Quite a bit

○ Very much

**PART 3**

**Instruction:** Please read each item carefully and select the response that best matches your current situation. Over the last 2 weeks, how often have you been bothered by the following problems?

**1. Feeling nervous, anxious, or on edge**

○ Not at all

○ Several days

○ More than half the days

○ Nearly every day

**2. Not being able to stop or control worrying**

○ Not at all

○ Several days

○ More than half the days

○ Nearly every day

**3. Worrying too much about different things**

○ Not at all

○ Several days

○ More than half the days

○ Nearly every day

**4. Trouble relaxing**

○ Not at all

○ Several days

○ More than half the days

○ Nearly every day

**5. Being so restless that it is hard to sit still**

○ Not at all

○ Several days

○ More than half the days

○ Nearly every day

**6. Becoming easily annoyed or irritable**

○ Not at all

○ Several days

○ More than half the days

○ Nearly every day

**7. Feeling afraid as if something awful might happen**

○ Not at all

○ Several days

○ More than half the days

○ Nearly every day

**PART 4**

**Instruction:** Please read each item carefully and select the response that best matches your current situation. Over the last 2 weeks, how often have you been bothered by any of the following problems?

**1.Little interest or pleasure in doing things**

○ Not at all

○ Several days

○ More than half the days

○ Nearly every day

**2. Feeling down, depressed, or hopeless**

○ Not at all

○ Several days

○ More than half the days

○ Nearly every day

**3. Trouble falling or staying asleep, or sleeping too much**

○ Not at all

○ Several days

○ More than half the days

○ Nearly every day

**4. Feeling tired or having little energy**

○ Not at all

○ Several days

○ More than half the days

○ Nearly every day

**5. Poor appetite or overeating**

○ Not at all

○ Several days

○ More than half the days

○ Nearly every day

**6. Feeling bad about yourself, or that you are a failure or have let yourself or your family down**

○ Not at all

○ Several days

○ More than half the days

○ Nearly every day

**7. Trouble concentrating on things, such as reading the newspaper or watching television**

○ Not at all

○ Several days

○ More than half the days

○ Nearly every day

**8. Moving or speaking so slowly that other people could have noticed? Or the opposite — being so fidgety or restless that you have been moving around a lot more than usual**

○ Not at all

○ Several days

○ More than half the days

○ Nearly every day

**9. Thoughts that you would be better off dead or of hurting yourself in some way**

○ Not at all

○ Several days

○ More than half the days

○ Nearly every day

**PART 5**

**Instruction:** There are seven items below. Each item is followed by five response options. Please select the option that best reflects your experience over the past two weeks.

**1. I can resist temptation very well**

○ Strongly disagree

○ Disagree

○ Neutral

○ Agree

○ Strongly agree

**2. I sometimes do things that pleasure me but are harmful to myself**

○ Strongly disagree

○ Disagree

○ Neutral

○ Agree

○ Strongly agree

**3. People say I have ironclad self-control**

○ Strongly disagree

○ Disagree

○ Neutral

○ Agree

○ Strongly agree

**4. Sometimes I get distracted by enjoyable activities and fail to complete tasks on time**

○ Strongly disagree

○ Disagree

○ Neutral

○ Agree

○ Strongly agree

**5. I can work efficiently toward a long-term goal**

○ Strongly disagree

○ Disagree

○ Neutral

○ Agree

○ Strongly agree

**6. Sometimes I can't help doing things I know are wrong**

○ Strongly disagree

○ Disagree

○ Neutral

○ Agree

○ Strongly agree

**7. I often act without thinking things through carefully**

○ Strongly disagree

○ Disagree

○ Neutral

○ Agree

○ Strongly agree

**PART 6**

**Instruction:** The following section contains 10 statements. Five response options follow each statement. Please select the option that best reflects your experience over the past two weeks.

**1. I can adapt when things change**

○ Never

○ Rarely

○ Sometimes

○ Often

○ Almost always

**2. I can handle whatever comes my way in life**

○ Never

○ Rarely

○ Sometimes

○ Often

○ Almost always

**3. When faced with difficulties, I try to focus on the positive aspects**

○ Never

○ Rarely

○ Sometimes

○ Often

○ Almost always

**4. Going through hardships makes me stronger**

○ Never

○ Rarely

○ Sometimes

○ Often

○ Almost always

**5. I recover quickly from illness, injury, or other setbacks**

○ Never

○ Rarely

○ Sometimes

○ Often

○ Almost always

**6. I believe I can achieve my goals despite obstacles**

○ Never

○ Rarely

○ Sometimes

○ Often

○ Almost always

**7. Under stress, I am still able to think clearly and focus**

○ Never

○ Rarely

○ Sometimes

○ Often

○ Almost always

**8. I am not easily discouraged by failure**

○ Never

○ Rarely

○ Sometimes

○ Often

○ Almost always

**9. I consider myself a strong person when dealing with life’s challenges and difficulties**

○ Never

○ Rarely

○ Sometimes

○ Often

○ Almost always

**10. I can manage unpleasant or painful emotions, such as sadness, fear, and anger**

○ Never

○ Rarely

○ Sometimes

○ Often

○ Almost always

**PART 7**

**Instruction:** The following section contains 10 statements. Seven response options follow each statement. Please select the option that best reflects your experience, according to the specific content of each item.

**1. When I want to feel more positive emotions** (*e.g., happiness or joy*)**, I change the way I think about the situation**

○ Strongly disagree

○ Moderately disagree

○ Slightly disagree

○ Neutral

○ Slightly agree

○ Moderately agree

○ Strongly agree

**2. I do not express my emotions**

○ Strongly disagree

○ Moderately disagree

○ Slightly disagree

○ Neutral

○ Slightly agree

○ Moderately agree

○ Strongly agree

**3. When I want to feel fewer negative emotions** (*e.g., sadness or anger*)**, I change the way I think about the situation**

○ Strongly disagree

○ Moderately disagree

○ Slightly disagree

○ Neutral

○ Slightly agree

○ Moderately agree

○ Strongly agree

**4. When I experience positive emotions, I am careful not to show them**

○ Strongly disagree

○ Moderately disagree

○ Slightly disagree

○ Neutral

○ Slightly agree

○ Moderately agree

○ Strongly agree

**5. In stressful situations, I try to think about them in a way that helps me stay calm**

○ Strongly disagree

○ Moderately disagree

○ Slightly disagree

○ Neutral

○ Slightly agree

○ Moderately agree

○ Strongly agree

**6. I control my emotions by not expressing them**

○ Strongly disagree

○ Moderately disagree

○ Slightly disagree

○ Neutral

○ Slightly agree

○ Moderately agree

○ Strongly agree

**7. When I want to feel more positive emotions, I change how I interpret the situation**

○ Strongly disagree

○ Moderately disagree

○ Slightly disagree

○ Neutral

○ Slightly agree

○ Moderately agree

○ Strongly agree

**8. I regulate my emotions by changing the way I think about the situation**

○ Strongly disagree

○ Moderately disagree

○ Slightly disagree

○ Neutral

○ Slightly agree

○ Moderately agree

○ Strongly agree

**9. When I experience negative emotions, I make sure not to show them**

○ Strongly disagree

○ Moderately disagree

○ Slightly disagree

○ Neutral

○ Slightly agree

○ Moderately agree

○ Strongly agree

**10. When I want to feel fewer negative emotions, I change how I interpret the situation**

○ Strongly disagree

○ Moderately disagree

○ Slightly disagree

○ Neutral

○ Slightly agree

○ Moderately agree

○ Strongly agree

**PART 8**

**Instruct:** The following 10 items assess the social support you receive in your daily life. Please respond to each item according to its specific instructions and based on your actual circumstances.

**1. How many close friends do you have who can provide you with support and help?**

○ None

○ 1-2

○ 3-5

○ 6 or more

**2. In the past year, your living arrangement has been**

○ Living alone, away from family

○ Frequently changing residence, mostly living with strangers

○ Living with classmates or friends

○ Living with family

**3. Regarding your neighbors**

○ We never care about each other; we are only acquaintances

○ They might show slight concern if I encounter difficulties

○ Some of my neighbors care about me

○ Most of my neighbors care about me

**4. Regarding your colleagues**

○ We never care about each other; we are only acquaintances

○ They might show slight concern if I encounter difficulties

○ Some of my colleagues care about me

○ Most of my colleagues care about me

**5. Support and care received from family members (Matrix Single Choice)**

| Family Member | None | Very little | Moderate | Full support |
| --- | --- | --- | --- | --- |
| Spouse/partner |  |  |  |  |
| Parents |  |  |  |  |
| Children |  |  |  |  |
| Siblings |  |  |  |  |
| Other relatives (*e.g., sister-in-law*) |  |  |  |  |

**6. In the past, when you faced emergencies or serious difficulties, which of the following sources provided you with financial assistance or practical help? (Select all that apply)**

☐ Spouse/partner

☐ Other family members

☐ Friends

☐ Relatives

☐ Colleagues/Classmates

☐ Employer/workplace

☐ Official or semi-official organizations (*e.g., Party, Youth League, trade unions*)

☐ Non-governmental organizations (*e.g., religious groups, community associations*)

☐ Other: _________________

☐ No source at all

**7. In the past, when you faced emergencies or serious difficulties, which of the following sources provided you with emotional comfort or caring support? (Select all that apply)**

☐ Spouse/partner

☐ Other family members

☐ Friends

☐ Relatives

☐ Colleagues/classmates

☐ Employer/workplace

☐ Official or semi-official organizations (*e.g., Party, Youth League, trade unions*)

☐ Non-governmental organizations (*e.g., religious groups, community associations*)

☐ Other: _________________

☐ No source at all

**8. When you are troubled, how do you typically express your concerns?**

○ I never talk to anyone about them

○ I only confide in 1-2 very close individuals

○ I would share if someone asks me directly

○ I actively share my troubles to seek support and understanding

**9. When you are troubled, how do you typically seek help?**

○ I rely solely on myself and do not accept help from others

○ I rarely ask others for help

○ I sometimes ask others for help

○ I frequently turn to family, friends, or organizations for assistance when in difficulty

**10. Regarding group activities (*e.g., Party, religious groups, trade unions, student associations*)**

○ Never participate

○ Occasionally participate

○ Often participate

○ Actively participate and take initiative

**PART 9**

**Instructions:** The following section contains 4 statements. Each statement is followed by seven response options. Please select the option that best reflects your perception of your socioeconomic status during childhood (before age 17).

**1. During childhood, my family had enough money to meet all my needs**

○ Strongly disagree

○ Disagree

○ Slightly disagree

○ Neutral

○ Slightly agree

○ Agree

○ Strongly agree

**2. During childhood, I was better off financially than most of my peers**

○ Strongly disagree

○ Disagree

○ Slightly disagree

○ Neutral

○ Slightly agree

○ Agree

○ Strongly agree

**3. During childhood, I grew up in a prosperous and stable neighborhood**

○ Strongly disagree

○ Disagree

○ Slightly disagree

○ Neutral

○ Slightly agree

○ Agree

○ Strongly agree

**4. During childhood, my parents held a relatively high socioeconomic position in the local community**

○ Strongly disagree

○ Disagree

○ Slightly disagree

○ Neutral

○ Slightly agree

○ Agree

○ Strongly agree

**PART 10**

**Instruction:** Welcome to the final section! This part collects basic demographic information. Thank you again for your time and trust!

**1. What is your gender?**

○ Male

○ Female

**2. What is your date of birth?** __________

**3. What is your height?** __________ **cm**

**4. What is your weight?** __________ **kg**

**5. What is your highest level of education completed?**

○ Associate degree or below

○ Bachelor’s degree

○ Master’s degree

○ Doctor’s degree or higher

**6. What is your average monthly expenditure (in RMB)?**

○ ¥1200 or less

○ ¥1201-¥2500

○ More than ¥2501

**7. What is your current marital status?**

○ Single

○ In a romantic relationship

○ Married
